# Habitat-Associations of Turban Snails on Intertidal and Subtidal Rocky Reefs

Amy F. Smoothey<sup>\*‡</sup>

Centre for Research on Ecological Impacts of Coastal Cities, Marine Ecology Laboratories A11, School of Biological Sciences, The University of Sydney, Sydney, NSW, Australia

## Abstract

Patchiness of habitat has important influences on distributions and abundances of organisms. Given the increasing threat of loss and alteration of habitats due to pressures associated with humans, there is a need for ecologists to understand species' requirements for habitat and to predict changes to taxa under various future environmental conditions. This study tested hypotheses about the generality of patterns described for one species of marine intertidal turban snail for a different, yet closely-related species in subtidal habitats along the coast of New South Wales, Australia. These two closely-related species live in similar habitats, yet under quite different conditions, which provided an opportunity to investigate how similar types of habitats influence patterns of distribution, abundance and size-structure in intertidal versus subtidal environments. For each species, there were similar associations between biogenically structured habitat and densities. The intertidal species, *Turbo undulatus*, were more abundant, with greater proportions of small individuals in habitats formed by the canopy-forming alga, *Hormosira banksii*, the solitary ascidian, *Pyura stolonifera* or the turfing red alga, *Corallina officinalis* compared to simple habitat (bare rock). Similarly, more *Turbo torquatus* were found in biogenically structured subtidal habitat, i.e. canopy-forming algae, *Ecklonia radiata*, mixed algal communities ('fringe'), or turfing red algae (*Corallina officinalis* and *Amphiroa anceps*) than where habitat is simple (barrens). Small *T. torquatus* were more abundant in areas of turf and 'fringe', while large snails were more abundant in areas of kelp and barrens. These patterns were found at each location sampled (i.e. eight intertidal and two subtidal rocky reefs) and at all times of sampling, across each environment. This study highlighted the consistent influence of biogenically structured habitats on the distribution, abundance and size-structure of intertidal and subtidal turban snails and forms a basis for increasing the understanding of the potential underlying processes causing such patterns.

**Citation:** Smoothey AF (2013) Habitat-Associations of Turban Snails on Intertidal and Subtidal Rocky Reefs. PLoS ONE 8(5): e61257. doi:10.1371/journal.pone.0061257

**Editor:** Tasman Crowe, University College Dublin, Ireland

**Received:** July 8, 2012; **Accepted:** March 9, 2013; **Published:** May 10, 2013

**Copyright:** © 2013 Amy F. Smoothey. This is an open-access article distributed under the terms of the Creative Commons Attribution License, which permits unrestricted use, distribution, and reproduction in any medium, provided the original author and source are credited.

**Funding:** The research in this manuscript was funded by an Australian Postgraduate Award (AFS) and the Australian Research Council through the Centre for Research on Ecological Impacts of Coastal Cities. The funders had no role in study design, data collection and analysis, decision to publish, or preparation of the manuscript.

**Competing Interests:** The author has declared that no competing interests exist.

\* E-mail: amy.smoothey@dpi.nsw.gov.au

‡ Current address: NSW Department of Primary Industries, Cronulla Fisheries Research Centre of Excellence, Cronulla, NSW, Australia

## Introduction

Patchiness of habitat has important influences on distributions and abundances of organisms that live in a mosaic with different habitats of varying structure and composition [1,2,3,4]. Knowledge of how organisms are distributed in relation to spatial heterogeneity of their environment is fundamental to ecology and has been of concern for many decades (see references in [3]). Despite there being numerous studies done to investigate influences of environmental heterogeneity on a single species in different types of habitat, there have been relatively few comparative tests of such research in different types of habitats for similar species, or among different species across similar types of habitats (e.g. [5,6,7]). There is even fewer such comparisons across different environments [8,9,10,11,12]. Consequently, ecology has been criticised for its lack of progress because of the lack of general ecological models that researchers need to be able to make accurate predictions under changing environmental conditions [13,14,15,16]. In the absence of general predictive models, there cannot be full understanding about ecological requirements of

organisms, nor the types of habitats with which they are associated [12,14,15,16,17,18,19,20].

Intertidal and subtidal rocky reefs are useful habitats for testing hypotheses about the generality of ecological patterns and processes [17,18,21]. Despite their apparent complexity and the differences associated with one being partially terrestrial and the other fully aquatic, they have many parallels. For example, each contains a diverse array of organisms and habitats that encompass a large array of environmental conditions which vary over small spatial scales [22,23,24,25]. Thus, each environment is characterized by interspersed patches of varying structure and composition, often only centimetres apart. This may result from physical features, such as pits or crevices on rocky substrata (e.g. [26,27]), or biogenic structures, such as, algae (e.g. [28,29]), ascidians (e.g. [30,31]) and mussels (e.g. [32,33]). From an animal's perspective, 'unsuitable' habitat may be interspersed among 'suitable' habitat, thus potentially restricting their distributions. Moreover, anthropogenic disturbances are considered a major threat to marine intertidal and subtidal assemblages [34,35,36]. Therefore, mitigating detrimental effects on species, for example due to loss and

fragmentation of habitat and, ultimately, to conserve individuals or populations, requires detailed knowledge of the species' habitat-requirements.

At mid to low tidal levels on intertidal rocky shores near Sydney, Australia, *Turbo undulatus*, a relatively common and widespread turban snail, appeared to occur in larger numbers in biogenically structured habitats formed by canopy-forming algae, *Hormosira banksii* (Turner) Decaisne (hereafter *Hormosira*), solitary ascidians, *Pyura stolonifera* Heller (hereafter *Pyura*) or turfing red algae, *Corallina officinalis* Linnaeus (hereafter *Corallina*) than in unstructured habitat – i.e. areas of exposed/open rocky substratum with few crevices, overhangs, pools of water or other biogenic structures created by other macro-algae or barnacles. The first aim of this study was to test the hypothesis that *T. undulatus* were significantly more abundant in these structured habitats than in unstructured habitat. Because heterogeneity of habitat can also influence sizes of marine individuals such as sea urchins (e.g. [37]) and other gastropods (e.g. [38]), this study also aimed to test the hypothesis that the size-structure of *T. undulatus* would differ between structured and adjacent unstructured habitat.

The second aim was to test for generality of patterns of habitat-association across environments and between species. Thus, patterns shown for the intertidal snail *T. undulatus*, were used as a general model, to predict patterns of distribution and size-structure of a closely-related species, *T. torquatus* among similar types of habitat on subtidal rocky reefs. It was, therefore, predicted that the relative patterns of distribution and size-structure of *T. torquatus* between structured and adjacent unstructured subtidal habitat would be the same as those shown by *T. undulatus*. Temperate subtidal rocky reefs are characterised by great heterogeneity in habitat-structure, with mosaics of different habitats, such as kelp, foliose algal turfs and encrusting algae or barrens [22,23,39,40]. Intertidal rocky shore habitats are the interface between terrestrial and aquatic environments and are potentially harsher environments than are subtidal reefs [41]. Comparative tests of patterns of habitat-associations between the two environments will provide a basic framework from which to better understand the influences of habitat on the dispersion of the snails and determine whether similar processes operate to create similar habitat-associations, irrespective of their environment. For comparative purposes, in each of these environments there are: (i) species of *Turbo* and (ii) similarities in the types of habitat (i.e. biogenically-structured and unstructured habitat). Here, subtidal biogenically structured habitats were patches containing either the canopy-forming algae, *Ecklonia radiata* (hereafter kelp), a 'fringe' habitat (with mixed algal communities) (hereafter 'fringe'), or turfing red algae (*Corallina officinalis* and *Amphiroa anceps*) (hereafter turf). Unstructured habitat was barrens defined as areas of open rocky reef covered in crustose coralline algae (>75%). Filamentous and turfing algae were largely absent, covering <10% of the substratum (as defined by [23]). The final aim was to test that the patterns of abundance and size-structure originally found for *T. undulatus* and *T. torquatus* would be consistent both in time and space.

## Methods

*Turbo undulatus* (Solander, 1786; maximal shell-width ~40 mm), is relatively common in mid to low tidal areas on intertidal rocky shores in New South Wales, Australia. *Turbo torquatus* (Gmelin, 1791; maximal shell-width ~100 mm) is a large snail commonly found on shallow subtidal rocky reefs of south-east and south-west Australia, except for Victoria and Tasmania, at latitudes above 28° S [42].

Eight intertidal rocky shores (Figure 1; NSW Fisheries research permit F96/146-6.0) were selected where *T. undulatus* were abundant (>10 per 0.25 m<sup>2</sup>) and the distribution of biogenically structured habitats was patchy, i.e. there were areas of homogeneous structured habitats interspersed with unstructured habitats. All locations were on the open-coast with medium to heavy exposure to waves.

Subtidal areas were relatively horizontal, sandstone rocky reefs at two locations: Cape Banks Scientific Marine Research Area (hereafter called Cape Banks) and Bare Island (Figure 1). All sites at Cape Banks were heavily exposed to waves from prevailing southerly swells, but sites at Bare Island were generally more protected.

To test hypotheses about abundances and sizes of *T. undulatus* in intertidal habitats, snails were counted and measured in haphazardly-thrown quadrats in areas of structured or adjacent unstructured habitat between 2004 and 2006. Maximum shell-widths were measured to the nearest 0.1 mm using vernier callipers. For the purpose of this study, small individuals were defined to be <14 mm shell-width; large snails were ≥14 mm (derived from clear cohorts in the size-frequency histograms of populations of snails across all sampled intertidal habitats). To examine differences in the proportion of small and large *T. undulatus* within, and between structured and adjacent unstructured habitat, data were analysed with Chi-squared tests. Each intertidal habitat was studied initially at one of three locations: Coal Cliff (*Hormosira*), Narrabeen (*Pyura*) and Mona Vale (*Corallina*) (Figure 1) because not all habitats were present at every location (Table 1). To test the generality of the patterns, two additional rocky shores for each type of habitat were sampled (except for *Corallina* which had one). The size and number of quadrats varied depending on the natural variation in population distributions (Table 1). Two independent sites (>10 m<sup>2</sup>, separated by approximately 10 s of metres), each with structured and unstructured habitat, were sampled at most locations (see Table 1 for exceptions), each at similar mid-low tidal heights and levels of wave-exposure.

On subtidal reefs, *Turbo torquatus* were counted and measured, initially at Cape Banks, in seven haphazardly-placed 5×1 m transects in areas of kelp, 'fringe', turf and barrens. This size of sampling unit has been found to give the greatest precision of estimates of densities for *T. torquatus*, in these habitats [43,44]. Maximum shell-widths were measured to the nearest 0.1 mm. For purposes of this study, small individuals were defined to be <48 mm shell-width; large snails were ≥48 mm. Sizes were derived from clear cohorts in size-frequency histograms of populations of snails across all sampled subtidal habitats. To test the hypothesis that the proportion of small and large *T. torquatus* would differ within, and between structured and adjacent unstructured habitat, data were analysed with Chi-squared tests. Due to the spatial configuration of habitats (i.e. areas of barrens were generally not adjacent to each type of structured habitat in sufficient size), it was not possible for structured and unstructured habitats to be sampled in a site within a location as in the intertidal system. Instead, three independent, haphazardly-chosen sites of each habitat, separated by 10 s of metres, at similar depths and levels of wave-exposure were sampled. To test the hypothesis about the patterns of distribution of *T. torquatus* on subtidal rocky reefs at Cape Banks, data were analysed with a two-factor ANOVA, where habitat was a fixed factor with four levels and site was a random factor with three levels and nested in habitat ( $n = 7$ ). On both times of sampling at Cape Banks (October 2004 & September 2005), variances were heterogeneous and, where possible, stabilized using a fourth root transformation. If variances

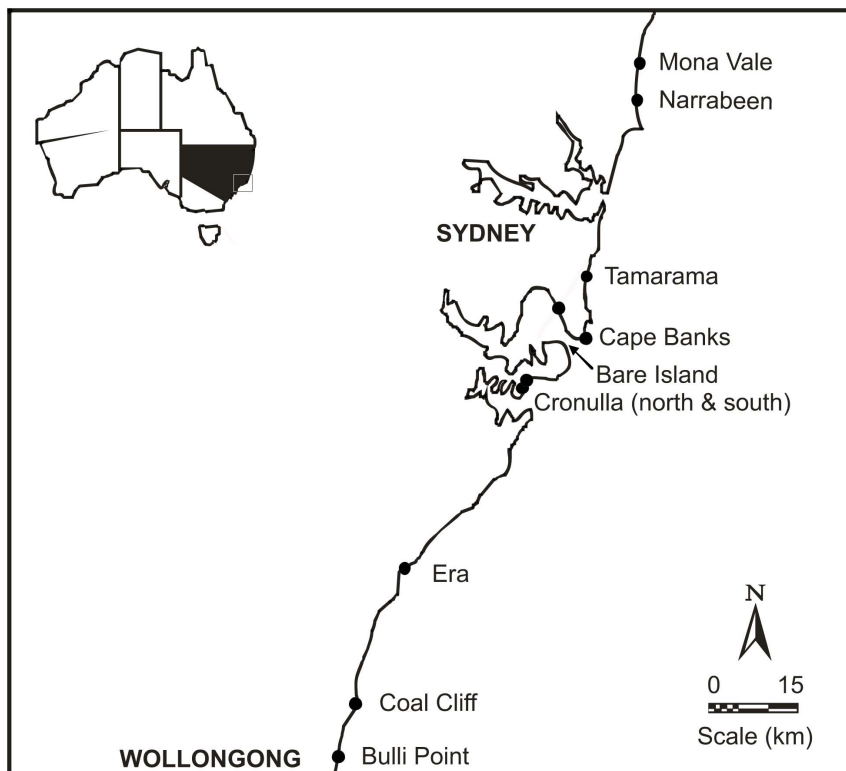

**Figure 1. Map of locations studied.**

doi:10.1371/journal.pone.0061257.g001

could not be stabilized, given the relatively robust nature of ANOVA to heterogeneous variances for sampling designs, similar to one used here [45], violation of homogeneity of variances was not considered to be a problem. Nevertheless, results were interpreted with caution, due to the increased probability of Type I error.

**Table 1. Number of quadrats and site(s) sampled in the Sydney Region, NSW, Australia on each intertidal rocky-shore from North to South.<sup>+</sup>**

| Study locations  | Quadrats    | No. of sites | <i>Hormosira</i> | <i>Pyura</i> | <i>Corallina</i> |
|------------------|-------------|--------------|------------------|--------------|------------------|
| Mona Vale        | 6, 50×50 cm | 2            |                  |              | ✓                |
| Narrabeen        | 8, 20×20 cm | 2            |                  | ✓            |                  |
| Tamarama         | 8, 20×20 cm | 2            |                  | ✓            |                  |
| Cronulla - north | 8, 20×20 cm | 2            |                  | ✓            |                  |
| Cronulla - south | 8, 50×50 cm | 1            | ✓                |              |                  |
| Era              | 6, 50×50 cm | 2            |                  |              | ✓                |
| Coal Cliff       | 8, 50×50 cm | 2            | ✓                |              |                  |
| Bulli            | 8, 50×50 cm | 2            | ✓                |              |                  |

<sup>+</sup>Mona Vale (33°40'33.46"S, 151°18'23.51"E), North Narrabeen (33°42'23.44"S, 151°17'18.1"E), Tamarama (33°53'52.8"S, 151°16'4.8"E), Cronulla - north and south (34°3'26.78"S, 151°9'7.88"E), Era (151°04'E, 34°09'S), Coal Cliff (34°14'0"S, 150°58'0"E) and Bulli Point (34°19'59.23"S, 150°55'7.14"E; see Figure 1). All locations are on the open-coast with medium to heavy exposure to waves. ✓ indicates the habitat sampled.

doi:10.1371/journal.pone.0061257.t001

To examine the model that the patterns found at Cape Banks are general (in time and space), the same habitat-types were re-sampled 11 months later when Bare Island was also sampled (September 2005). Due to the limited amount of habitat at Bare Island, only two sites of each habitat were sampled and turf was not sampled. Therefore, one site of each type of habitat was removed randomly from Cape Banks, to be comparable with Bare Island and avoid using an unbalanced design. To test the hypothesis that patterns found at Cape Banks would be the same at Bare Island, data were analysed with a three-factor ANOVA, where location and site were random, with two levels each and habitat was fixed with three levels.

## Results

There were more *T. undulatus* in structured than in adjacent unstructured intertidal habitats (Figure 2). In all locations and at all times, only nine individuals were recorded in unstructured habitat, with a maximal density of three snails in one quadrat (0.25 m<sup>2</sup>). In structured habitats, in contrast, *T. undulatus* reached a maximal density of 121 per 0.25 m<sup>2</sup> (Figure 2). Given such striking differences in densities, no formal analysis was done.

Of the nine snails in unstructured habitat, six were large. In structured habitats, 61, 13 and 82% of the individuals were small in *Hormosira*, *Pyura* and *Corallina*, respectively (Table 2a, b, c). Thus, on average, there were more small *T. undulatus* (<14 mm shell-width) than large snails in *Hormosira* and *Corallina* (Table 2a, c), whereas in *Pyura*, there were significantly more large than small snails (Table 2b). No formal analyses compared size-frequency distributions between structured and unstructured habitat because of the small number of snails in the latter. Nevertheless, small

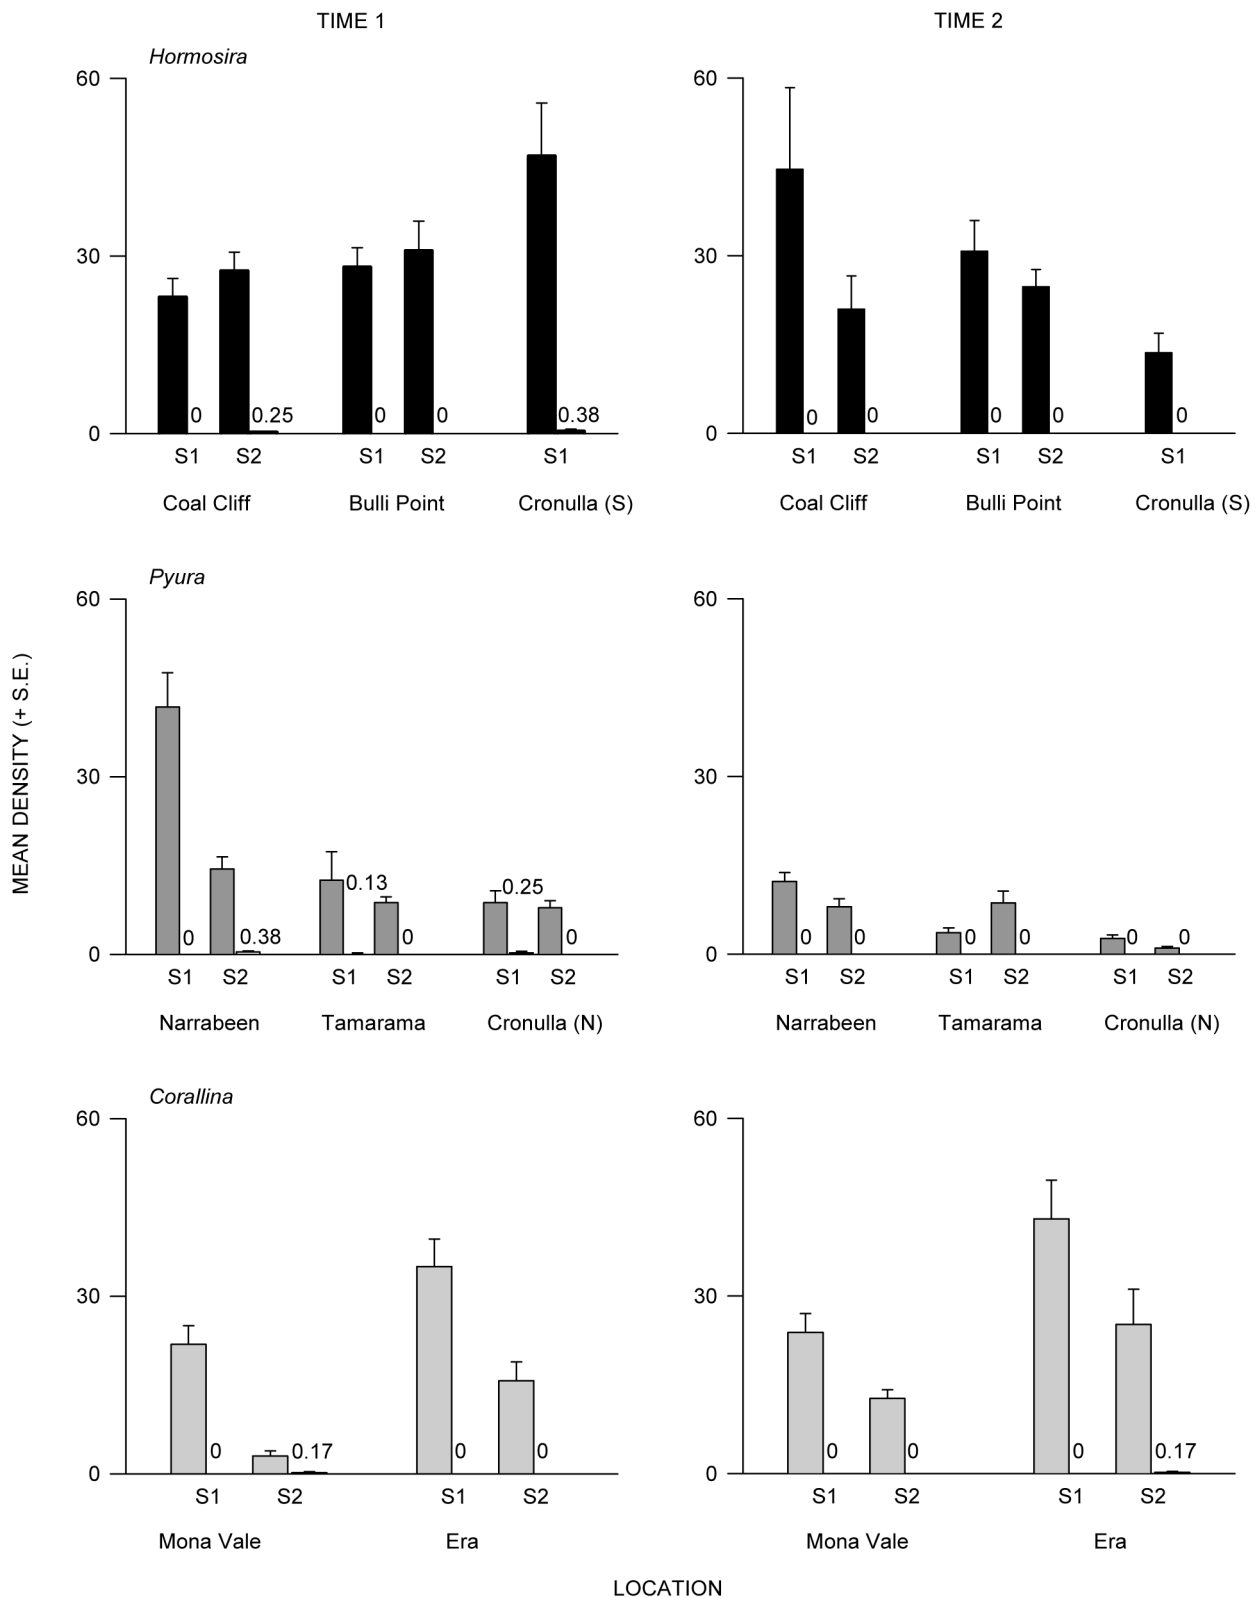

**Figure 2. Mean density of *Turbo undulatus* on intertidal rocky reefs.** Mean density (+ S.E.;  $n=8$ ) of *T. undulatus* in areas of (a) *Hormosira* (black bars; quadrat  $0.25 \text{ m}^2$ ) and non-*Hormosira* (white bars), (b) *Pyura* (dark grey bars; quadrat  $0.04 \text{ m}^2$ ) and non-*Pyura* (white bars) and (c) *Corallina* ( $n=6$ ; quadrat  $0.25 \text{ m}^2$ , grey bars) and non-*Corallina* (white bars), at each location and at each time of sampling. In areas of unstructured habitat (e.g. non-*Hormosira*), mean density of individuals are presented above the columns, where needed, due to the small number of individuals.  
doi:10.1371/journal.pone.0061257.g002

**Table 2.** Analyses of the proportion of small (and thus, large) *T. undulatus* in intertidal, structured habitats at each location and time of sampling.<sup>+</sup>

|     |                  | TIME 1      |       |          |     | TIME 2      |       |          |     |
|-----|------------------|-------------|-------|----------|-----|-------------|-------|----------|-----|
|     |                  | No. sampled | Small | $\chi^2$ | P   | No. sampled | Small | $\chi^2$ | P   |
| (a) | <i>Hormosira</i> |             |       |          |     |             |       |          |     |
|     | Coal Cliff       | 404         | 0.33  | 45.78    | *** | 525         | 0.70  | 81.62    | *** |
|     | Bulli Point      | 410         | 0.65  | 38.72    | *** | 394         | 0.90  | 250.24   | *** |
|     | Cronulla - south | 375         | 0.42  | 8.66     | **  | 169         | 0.68  | 22.02    | *** |
| (b) | <i>Pyura</i>     |             |       |          |     |             |       |          |     |
|     | Narrabeen        | -           | -     | -        | -   | 162         | 0.04  | 138.89   | *** |
|     | Tamarama         | -           | -     | -        | -   | 98          | 0.16  | 44.40    | *** |
|     | Cronulla - north | 133         | 0.17  | 56.91    | *** | 72          | 0.21  | 24.50    | *** |
| (c) | <i>Corallina</i> |             |       |          |     |             |       |          |     |
|     | Mona vale        | 174         | 0.79  | 59.79    | *** | 257         | 0.88  | 151.01   | *** |
|     | Era              | 304         | 0.81  | 118.75   | *** | 557         | 0.81  | 211.22   | *** |

<sup>+</sup>Due to the limited number of snails in unstructured habitat, they were not analysed.

\*\* $P < 0.01$ ,

\*\*\* $P < 0.001$  and - denotes no data available.

doi:10.1371/journal.pone.0061257.t002

snails appeared to be largely restricted to structured habitats, although large snails were found in all habitats.

Overall, there were greater densities of *T. torquatus* in areas of kelp, 'fringe' or turf than in barrens (Table 3, Figure 3), despite variability among sites. There were also significantly more small *T. torquatus* (<48 mm shell-width) than large snails in 'fringe' or turf (Table 4a), whereas in barrens or kelp, there were significantly more large than small snails (Table 4a). Spatial patterns of abundance and size-structure of *T. torquatus* the second time of sampling at Cape Banks were consistent with the first time, although there was no difference in densities of snails between barren and turf habitats (Tables 3, 4a; Figure 3). In addition, areas of kelp and 'fringe', had greater densities of snails during time 2 than time 1. When the spatial generality of the patterns was tested at Bare Island, similar results were found; more in structured than in unstructured habitat (Tables 3b, 4b).

## Discussion

Many studies have shown the importance of structurally-complex biogenic habitats on intertidal or subtidal rocky reefs, for example beds of algae (e.g. [40,46,47]), as influences on small-scale patterns of distribution of a diverse array of taxa. Structured, biogenic habitats on intertidal rocky shores consistently influenced patterns of distribution of *T. undulatus*, irrespective of their type and structure (*Hormosira*, *Pyura* or *Corallina*). Specifically, all structured habitats were associated with greater densities of *T. undulatus* than in adjacent unstructured habitat on each of the rocky shores sampled.

Despite major differences between intertidal and subtidal systems, several generalities emerged. The first was the overall consistent difference in density of snails between structured habitats of biogenic origin and unstructured, non-biogenic subtidal habitat. Hence, the spatial patterns of *T. undulatus* on intertidal rocky shores were useful, as a general model, to predict patterns of distribution of *T. torquatus* among similar habitats on subtidal rocky reefs. Previous studies have also demonstrated the importance of similar types of habitats on the distribution and abundance of *T. undulatus* [48] and *T. torquatus* [44] in New South Wales and elsewhere [49,50,51],

**Table 3.** Analyses of densities of *T. torquatus* among subtidal habitats at (a)<sup>+</sup>Cape Banks during each time of sampling and (b)<sup>++</sup>Cape Banks and Bare Island.

|     |                   | df | TIME 1                  |           | TIME 2                  |          |
|-----|-------------------|----|-------------------------|-----------|-------------------------|----------|
|     |                   |    | MS                      | F         | MS                      | F        |
| (a) | Cochran's Test    |    | <sup>a</sup> C = 0.23 S |           | <sup>a</sup> C = 0.30** |          |
|     | Habitat = Ha      | 3  | 5.91                    | 12.67***  | 5.30                    | 21.54*** |
|     | Site(Ha) = Si(Ha) | 8  | 0.47                    | 2.87*     | 0.25                    | 1.88 NS  |
|     | Residual          | 72 | 0.16                    |           | 0.13                    |          |
|     | SNK               |    | B < T = F = K           |           | B = T < F = K           |          |
| (b) | Cochran's Test    |    | C = 0.20 NS             |           |                         |          |
|     | Lo                | 1  | 42.86                   | 6.50*     |                         |          |
|     | Ha                | 2  | 704.62 <sup>x</sup>     | 106.93*** |                         |          |
|     | Si(Lo x Ha)       | 6  | 8.64                    |           |                         |          |
|     | Lo x Ha           | 2  | 0.43                    |           |                         |          |
|     | Residual          | 72 | 12.96                   |           |                         |          |
|     | SNK               |    | B < F < K               |           |                         |          |

<sup>+</sup>Habitat, fixed 4 levels, Site, random, nested in Habitat, 3 levels,  $n = 7$  and (b).

<sup>++</sup>Cape Banks and Bare Island; Location, random 2 levels, Habitat, fixed, orthogonal, 3 levels, Site, random, nested in (Location x Habitat),  $n = 7$ . One site of each type of habitat was removed randomly from Cape Banks, for each time of sampling to be comparable with Bare Island.

<sup>a</sup>Variances were heterogeneous and were stabilised, where possible, using a forth root transformation ( $X^{0.25}$ ). Significant differences in means were compared using Student-Newman-Keuls (SNK) tests. NS denotes not significant,

\* $P < 0.05$ ,

\*\* $P < 0.01$ ,

\*\*\* $P < 0.001$ . For SNK comparisons: B, barrens; K, kelp; F, fringe; T, turf.

<sup>x</sup>Denotes *post-hoc* pooling,  $P > 0.25$ . New *F*-values are given for those tested against the pooled term.

<sup>x</sup>Tested against Si(Lo x Ha), Lo x Ha and Residual.

doi:10.1371/journal.pone.0061257.t003

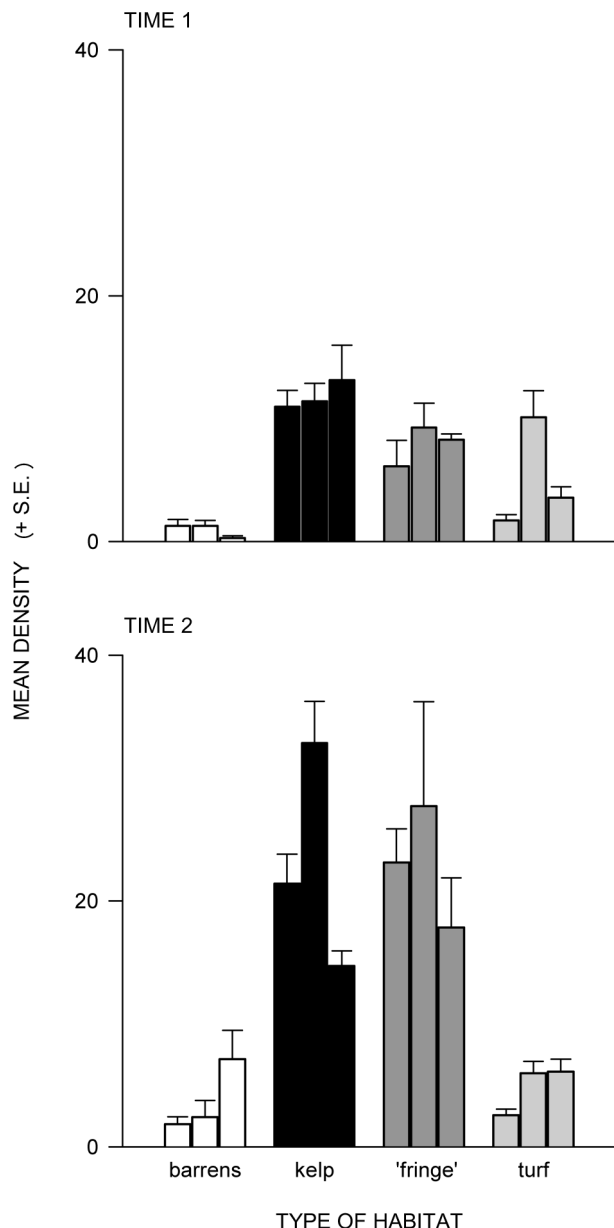

**Figure 3. Mean density of *Turbo torquatus* on subtidal rocky reefs.** Mean density (+ S.E.;  $n = 7$ ) of *T. torquatus* in  $5 \times 1$  m transects in each of three representative sites of each habitat at Cape Banks at (a) time 1 and (b) time 2.  
doi:10.1371/journal.pone.0061257.g003

and for other turbinid gastropods (e.g. *Turbo smaragdus* [52,53,54]). For example, Povey and Keough [49] found in Victoria, Australia densities of *T. undulatus* were greater in areas with large covers of *H. banksii* than elsewhere. *T. torquatus* demonstrated similar spatial patchiness in subtidal habitats in Western Australia, being more abundant in areas of 'flat reef' (with *E. radiata* and *Sargassum* spp., [55]) than 'rock face' (defined as steeply sloping rock surfaces at the base of steep rock faces; [50]). Fowler-Walker and Connell [56], however, found greater abundances of *T. torquatus* in areas devoid of macro-algae on subtidal reefs in eastern and southern Australia. Their choice of sampling unit (i.e. size and number of quadrats;  $1 \text{ m}^2$ ;  $n = 6$ ) was chosen to sample kelp and may not have been appropriate for turbinid gastropods and their estimates of

abundances are likely to be imprecise compared to studies that have used larger sampling units.

Of the few comparative studies to test hypotheses about consistency of patterns of distribution, abundance and composition of individual species or assemblages between different environments, most have, however, shown patterns to differ. For example, Fielding et al. [57] showed that the macro-invertebrates associated with *P. stolonifera* on intertidal and subtidal rocky reefs along the coast of South Africa differed, despite 42 taxa being common to both. This difference was largely attributed to differences in species composition associated with the *P. stolonifera* in the two environments. On intertidal shores, polychaetes were the dominant invertebrates, whereas crustaceans were the dominant subtidal group [57]. Similar to patterns found here, the snail *Bembicium auratum* were in greater densities in areas of biogenic structure; oysters opposed to bare rock on rocky shores and in mangrove forests in NSW [9,58].

Another striking pattern found between the two types of habitats in intertidal and subtidal environments was in sizes of snails. In general, small *T. undulatus* were found more in intertidal biogenically structured habitats than were large snails; areas of unstructured habitat had very few individuals smaller than 8 mm. This is consistent with the results of Worthington and Fairweather [48], which showed that *T. undulatus* from areas without coralline algae were larger than from areas with algae. Small *T. torquatus* had larger densities in areas of turf and 'fringe', while large snails had greater densities in areas of kelp and barrens (see also [44]).

The confidence with which results can be generalised depends on whether the patterns found are consistent in space and time. In some cases where spatial generality of patterns has successfully been tested (e.g. [59,60,61]), patterns varied from place to place, but there was also much variability at the smallest spatial scales (e.g. [62]). Nevertheless, small-scale variability can still be consistent at large scales. In this study it was found that patterns of densities and sizes of turban snails between structured and unstructured habitats initially discovered on a few shores, in the Sydney region, were consistent over other intertidal and subtidal location(s). Moreover, by sampling a second time to assess the precision with which these models can be extrapolated, spatial and size-structure patterns in each system were found to be consistent from one time to the next. Differential use of habitats by organisms has been demonstrated over shorter time-scales than those examined in this study, for example due to the state of tide, time of day, or conditions of weather. The present intertidal study was only done during day-time low-tides, although casual observations during high-tide in areas with *Hormosira* suggested no difference in patterns of *T. undulatus* between high and low tide. *T. torquatus* in contrast lives subtidally and, to show if there was any potential influence of environmental variables on the patterns of *T. torquatus*, sampling of each type of habitat was, as far as possible, stratified for state of tide, time of day (morning vs afternoon) and weather-conditions (calm vs rough).

Given that scales of variability of spatial and size-structure patterns can help to identify the scales of processes influencing patterns, the physical and biological processes determining the patterns of difference found in this study are most likely general to intertidal and subtidal habitats at all locations sampled [63]. For example, differences in spatial and size-structure patterns may be explained by differences in rates of growth and longevity (e.g. [64]), differential patterns of recruitment (e.g. [65]), differential rates of mortality (e.g. [66]), or movement in relation to features of the habitats (e.g. [67]) or physical characteristics of the habitats on the spatial distribution of the organisms (e.g. [68]). While these

**Table 4.** Analyses of the proportion of small (and thus, large) *T. torquatus* in structured and unstructured habitats on subtidal rocky reefs at each location and time of sampling.<sup>+</sup>

|                 | TIME 1      |       |          |     | TIME 2      |       |          |     |
|-----------------|-------------|-------|----------|-----|-------------|-------|----------|-----|
|                 | No. sampled | Small | $\chi^2$ | P   | No. sampled | Small | $\chi^2$ | P   |
| (a) Cape Banks  |             |       |          |     |             |       |          |     |
| barrens         | 20          | 0.05  | 16.20    | *** | 80          | 0.24  | 22.05    | *** |
| kelp            | 249         | 0.36  | 20.25    | *** | 483         | 0.22  | 156.57   | *** |
| 'fringe'        | 167         | 0.86  | 156.50   | *** | 481         | 0.76  | 135.19   | *** |
| turf            | 108         | 0.99  | 104.04   | *** | 103         | 0.95  | 83.97    | *** |
| (b) Bare Island |             |       |          |     |             |       |          |     |
| kelp            | 139         | 0.27  | 28.55    | *** |             |       |          |     |
| 'fringe'        | 84          | 0.64  | 6.86     | **  |             |       |          |     |

\*\*\*  $P < 0.01$  and \*\*\*  $P < 0.001$ .

doi:10.1371/journal.pone.0061257.t004

processes may act in isolation of one another, they may also interact to create the observed patterns.

The consistent small-scale variability in patterns of snails found here (e.g. *Hormosira* to non-*Hormosira* cms to ms apart) suggests that the environmental cues that govern these patterns are more likely to alter spatial variation in abundance via behavioural processes, rather than via recruitment and/or mortality [69]. Associations with structured habitats may, therefore, be due to active movement of the snails in relation to intrinsic differences between the structured and unstructured habitat. Features of habitat to which the snails may respond include physical differences, such as greater structural complexity of these habitats relative to surrounding areas (e.g. [70]) and/or biological characteristics, such as food, directly or indirectly (e.g. [71]), or the 'local environment' where the habitat is found (e.g. height on the shore, [72]).

Despite generalities being difficult to identify because of large and complex spatial and temporal variability in responses of organisms across a range of scales [73], this study has shown very striking and predictable spatial patterns of density and sizes of each species of snail with respect to the presence of structured habitats. This was achieved through the use of formal hypotheses, rigorous sampling designs and ensuring that information being compared was commensurable (i.e. in each of these environments there are: (i) species of *Turbo* and (ii) similarities in the types of habitat). Theoretically, differences in the methods of sampling could have confounded these comparisons (in most cases, *Turbo undulatus* were sampled in 0.25 m<sup>2</sup> and *Turbo torquatus* in 1 m<sup>2</sup>; which were chosen

to reflect natural variation in population distributions). There was, however, no evidence that methods of sampling caused problems, because patterns were generally similar. To determine whether similar features of habitats influence the snails in similar ways, irrespective of the species (*T. undulatus* or *T. torquatus*) or the environment (intertidal or subtidal), experimental tests of hypotheses about aspects of each species of snail's behavioural responses to some features of habitat, i.e. biological and/or physical characteristics or features associated with the 'local environment' where the habitats are found is needed. Therefore, future experimentation using similar comparative approaches, will increase the predictive capacity of ecological research to contribute to issues of conservation and management of these species and their habitats, in the face of increasing anthropogenic pressures.

## Acknowledgments

The author is grateful to M.G. Chapman, A.J. Underwood, P.J. Goodsell, M. Mayer-Pinto, S. J. Kennelly and two anonymous referees for helpful advice and comments on earlier drafts of this research. Thanks to C.J. Zagal, L. Edwards, B.G. Clynick, B.A. Smoothey and J.W. Smoothey for assistance in the field.

## Author Contributions

Conceived and designed the experiments: AFS. Performed the experiments: AFS. Analyzed the data: AFS. Contributed reagents/materials/analysis tools: AFS. Wrote the paper: AFS.

## References

- Wiens JA (1976) Population responses to patchy environments. Annual Review of Ecology and Systematics 7: 81–120.
- Levin SA (1992) The problem of pattern and scale in ecology. Ecology 73: 1943–1967.
- Kolasa J, Pickett STA (1991) Ecological Heterogeneity. New York: Springer-Verlag.
- Goodsell PJ (2009) Diversity in fragments of artificial and natural marine habitats. Marine Ecology Progress Series 384: 23–31.
- Cole VJ, Chapman MG, Underwood AJ (2007) Landscapes and life-histories influence colonisation of polychaetes to intertidal biogenic habitats. Journal of Experimental Marine Biology and Ecology 348: 191–199.
- Firth LB, Crowe TP (2010) Competition and habitat suitability: small-scale segregation underpins large-scale coexistence of key species on temperate rocky shores. Oecologia 162: 163–174.
- Kelaher BP, Castilla JC, Prado L (2007) Is there redundancy in bioengineering for molluscan assemblages on the rocky shores of central Chile? Revista Chilena de Historia Natural 80: 173–186.
- Coleman MA (2002) Small-scale spatial variability in intertidal and subtidal turfing algal assemblages and the temporal generality of these patterns. Journal of Experimental Marine Biology and Ecology 267: 53–74.
- Crowe TP (1996) Different effects of microhabitat fragmentation patterns of dispersal on intertidal gastropod in two habitats. Journal of Experimental Marine Biology and Ecology 206: 83–107.
- Beck MW (1998) Comparison of the measurement and effects of habitat structure on gastropods in rocky intertidal and mangrove habitats. Marine Ecology-Progress Series 169: 165–178.
- Martinez E, Fuentes E (1993) Can we extrapolate the California model of grassland-shrubland ecotone. Ecological Applications 3: 417–423.
- Crowe TP, Underwood AJ (1999) Differences in dispersal of an intertidal gastropod in two habitats: the need for and design of repeated experimental transplantation. Journal of Experimental Marine Biology and Ecology 237: 31–60.



13. Tilman D (1989) Discussion: population dynamics and species interactions. In: Roughgarden J, May RM, Levin SA, editors. Perspectives in Ecological Theory. New Jersey: Princeton University Press. pp. 89–100.
14. Peters RH (1991) A critique for ecology. Cambridge: Cambridge University Press.
15. Weiner J (1995) On the practice of ecology. *Journal of Ecology* 83: 153–158.
16. Underwood AJ, Denley EJ (1984) Paradigms, explanations and generalizations in models for the structure of intertidal communities on rocky shores. In: Strong DR, Simberloff D, Abele LG, Thistle A, editors. Ecological Communities: Conceptual Issues and the Evidence. New Jersey: Princeton University Press. pp. 151–180.
17. Underwood AJ (2000) Experimental ecology of rocky intertidal habitats: What are we learning? *Journal of Experimental Marine Biology and Ecology* 250: 51–76.
18. Foster MS (1990) Organization of macroalgal assemblages in the Northeast Pacific: the assumption of homogeneity and the illusion of generality. *Hydrobiologia* 192: 21–33.
19. Beck MW (1997b) Inference and generality in ecology: Current problems and an experimental solution. *OIKOS* 78: 265–273.
20. Lawton JH (1999) Are there general laws in ecology? *Oikos* 84: 177–192.
21. Bertness MD, Leonard GH (1997) The role of positive interactions in communities: lessons from intertidal habitats. *Ecology* 78: 1976–1989.
22. Jones GP, Andrew NL (1990) Herbivory and patch dynamics on rocky reefs in temperate Australasia: the roles of fish and sea urchins. *Austral Ecology* 15: 505–520.
23. Underwood AJ, Kingsford MJ, Andrew NL (1991) Patterns in shallow subtidal marine assemblages along the coast of New South Wales. *Australian Journal of Ecology* 6: 231–249.
24. Menge BA, Branch GM (2001) Rocky intertidal communities. In: Bertness MD, Hay ME, Gaines SD, editors. Marine Community Ecology. Sunderland, Massachusetts: Sinauer Associates, Inc. pp. 221–252.
25. Witman JD, Dayton PK (2001) Rocky subtidal communities. In: Bertness MD, Hay ME, Gaines SD, editors. Marine Community Ecology. Sunderland, Massachusetts: Sinauer Associates, Inc. pp. 339–366.
26. Raffaelli DG, Hughes RN (1978) The effects of crevice size and availability on populations of *Littorina rudis* and *Littorina neritoides*. *Journal of Animal Ecology* 47: 71–83.
27. Fletcher WJ (1987) Interactions among subtidal Australian sea urchins, gastropods, and algae: effects of experimental removals. *Ecological Monographs* 57: 80–109.
28. Kelaher BP, Chapman MG, Underwood AJ (2001) Spatial patterns of diverse macrofaunal assemblages in coralline turf and their associations with environmental variables. *Journal of the Marine Biological Association of the United Kingdom* 81: 917–930.
29. Melville AJ, Connell SD (2001) Experimental effects of kelp canopies on subtidal coralline algae. *Austral Ecology* 26: 102–108.
30. Monteiro SM, Chapman MG, Underwood AJ (2002) Patches of the ascidian *Pyura stolonifera* (Heller, 1878): structure of habitat and associated intertidal assemblages. *Journal of Experimental Marine Biology and Ecology* 270: 171–189.
31. Castilla JC, Lagos NA, Cerdà M (2004) Marine ecosystem engineering by the alien ascidian *Pyura praeputialis* on a mid-intertidal rocky shore. *Marine Ecology-Progress Series* 268: 119–130.
32. Crooks JA (1998) Habitat alteration and community-level effects of an exotic mussel, *Musculista senhousia*. *Marine Ecology-Progress Series* 162: 137–152.
33. O'Connor NE, Crowe TP (2007) Biodiversity among mussels: separating the influence of sizes of mussels from the ages of patches. *Journal of the Marine Biological Association of the United Kingdom* 87: 551–557.
34. Crowe TP, Thompson RC, Bray S, Hawkins SJ (2000) Impacts of anthropogenic stress on rocky intertidal communities. *Journal of Aquatic Ecosystem Stress and Recovery* (Formerly *Journal of Aquatic Ecosystem Health*) 7: 273–297.
35. Steneck RS, Carlton JT (2001) Human alterations of marine communities: students beware! In: Bertness MD, Hay ME, Gaines SD, editors. Marine Community Ecology. Sunderland, Massachusetts: Sinauer Associates, Inc. pp. 445–468.
36. Thompson RC, Crowe TP, Hawkins SJ (2002) Rocky intertidal communities: past environmental changes, present status and predictions for the next 25 years. *Environmental Conservation* 29: 168–191.
37. Dumont C, Himmelman JH, Russell MP (2004) Size-specific movement of green sea urchins *Strongylocentrotus droebachiensis* on urchin barrens in eastern Canada. *Marine Ecology-Progress Series* 276: 93–101.
38. Chapman MG (1994) Small-scale patterns of distribution and size-structure of the intertidal littorinid *Littorina unifasciata* (Gastropoda: Littorinidae) in New South Wales. *Australian Journal of Marine and Freshwater Research* 45: 635–652.
39. Choat JH, Schiel DR (1982) Patterns of distribution and abundance of large brown algae and invertebrate herbivores in subtidal regions of northern New Zealand. *Journal of Experimental Marine Biology and Ecology* 60: 129–162.
40. Schiel DR, Foster MS (1986) The structure of subtidal algal stands in temperate waters. *Oceanographic Marine Biology Annual Review* 24: 265–307.
41. Lewis JR (1964) The ecology of rocky shores. London: English Universities Press. 323 p.
42. Joll LM (1980) Reproductive biology of two species of *Turbinidae* Mollusca Gastropoda. *Australian Journal of Marine and Freshwater Research* 31: 319–336.
43. Blount C (2004) Density-dependent aspects of the ecology of the sea urchin *Centrostephanus rodgersii* [Ph.D. thesis]. Sydney University of Sydney.
44. Ettinger-Epstein P, Kingsford MJ (2008) Effects of the El Niño southern oscillation on *Turbo torquatus* (Gastropoda) and their kelp habitat. *Austral Ecology* 33: 594–606.
45. Underwood AJ (1997) Experiments on ecology: their logical design and interpretation using analysis of variance. Cambridge: Cambridge University Press. 504 p.
46. Kennelly SJ (1983) An experimental approach to the study of factors affecting algal colonization in a sublittoral kelp forest. *Journal of Experimental Marine Biology and Ecology* 68: 257–276.
47. Lilley SA, Schiel DR (2006) Community effects following the deletion of a habitat-forming alga from rocky marine shores. *Oecologia* 148: 672–681.
48. Worthington DG, Fairweather PG (1989) Shelter and food: interactions between *Turbo undulatum* (Archaeogastropoda: Turbinidae) and coralline algae on rocky seashores in New South Wales. *Journal of Experimental Marine Biology and Ecology* 129: 61–79.
49. Povey A, Keough MJ (1991) Effects of trampling on plant and animal populations on rocky shores. *OIKOS* 61: 355–368.
50. Vanderklift MA, Kendrick GA (2004) Variation in abundances of herbivorous invertebrates in temperate subtidal rocky reef habitats. *Marine and Freshwater Research* 55: 93–103.
51. Wernberg T, White M, Vanderklift MA (2008) Population structure of turbinid gastropods on wave-exposed subtidal reefs: effects of density, body size and algae on grazing behaviour. *Marine Ecology-Progress Series* 362: 169–179.
52. Walsby JR (1977) Population variations in grazing turbinid *Lumella smaragda* (Mollusca: Gastropoda). *New Zealand Journal of Marine and Freshwater Research* 11: 211–238.
53. Alfaro AC (2006) Tidal migration influences the zonation of grazing snails (*Turbo smaragdus*) in a mangrove-seagrass estuary, northern New Zealand. *Estuaries and Coasts* 29: 731–736.
54. Alfaro AC, Dewas SE, Thomas F (2007) Food and habitat partitioning in grazing snails (*Turbo smaragdus*), northern New Zealand. *Estuaries and Coasts* 30: 431–440.
55. Kendrick GA, Lavery PS, Phillips JC (1999) Influence of *Ecklonia radiata* kelp canopy on structure of macro-algal assemblages in Marmion Lagoon, Western Australia. *Hydrobiologia* 398–399: 275–283.
56. Fowler-Walker MJ, Connell SD (2002) Opposing states of subtidal habitat across temperate Australia: consistency and predictability in kelp canopy-benthic associations. *Marine Ecology-Progress Series* 240: 49–56.
57. Fielding PJ, Weerts KA, Forbes AT (1994) Macroinvertebrate communities associated with intertidal and subtidal beds of *Pyura stolonifera* (Heller) (Tunicata: Ascidacea) on the Natal coast. *South African Journal of Zoology* 29: 46–53.
58. Underwood AJ, Barrett G (1990) Experiments on the influence of oysters on the distribution abundance and sizes of the gastropod *Bembicium auratum* in a mangrove swamp in New South Wales Australia. *Journal of Experimental Marine Biology and Ecology* 137: 25–46.
59. Gee JM, Warwick RM (1996) A study of global biodiversity patterns in the marine motile fauna of hard substrata. *Journal of the Marine Biological Association of the United Kingdom* 76: 177–184.
60. Chapman MG, Underwood AJ (1998) Inconsistency and variation in the development of rocky intertidal algal assemblages. *Journal of Experimental Marine Biology and Ecology* 224: 265–289.
61. Jenkins SR, Aberg P, Cervin G, Coleman RA, Delany J, et al. (2001) Population dynamics of the intertidal barnacle *Semibalanus balanoides* at three European locations: spatial scales of variability. *Marine Ecology-Progress Series* 217: 207–217.
62. Foster MS, De Vogelaere AP, Harrold C, Pearse JS, Thum AB (1988) Causes of spatial and temporal patterns in rocky intertidal communities of central and northern California. *Memoirs of the California Academy of Science* 9: 1–45.
63. Underwood AJ, Petraitis PS (1993) Structure of intertidal assemblages in different locations: how can local processes be compared? In: Ricklefs RE, Schluter D, editors. Species Diversity in Ecological Communities. Chicago: University of Chicago. pp. 38–51.
64. Jeffery CJ, Underwood AJ (2001) Longevity determines sizes of an adult intertidal barnacle. *Journal of Experimental Marine Biology and Ecology* 256: 85–97.
65. Keough MJ, Downes BJ (1982) Recruitment of marine invertebrates: the role of active larval choices and early mortality. *Oecologia* 54: 348–352.
66. Gosselin LA, Qian P (1997) Juvenile mortality in benthic marine invertebrates. *Marine Ecology-Progress Series* 146: 265–282.
67. Chapman MG (2000) A comparative study of differences among species and patches of habitat on movements of three species of intertidal gastropods. *Journal of Experimental Marine Biology and Ecology* 244: 181–201.
68. Harvey M, Bourget E, Ingram RG (1995) Experimental evidence of passive accumulation of marine bivalve larvae on filamentous epibenthic structures. *Limnology and Oceanography* 40: 94–104.
69. Underwood AJ, Chapman MG (1996) Scales of spatial patterns of distribution of intertidal invertebrates. *Oecologia* 107: 212–224.



70. Crooks JA, Khim HS (1999) Architectural vs. biological effects of a habitat-altering, exotic mussel, *Musculista senhousia*. *Journal of Experimental Marine Biology and Ecology* 240: 53–75.
71. Ricciardi A, Whoriskey FG, Rasmussen JB (1997) The role of the zebra mussel (*Dreissena polymorpha*) in structuring macroinvertebrate communities on hard substrata. *Canadian Journal of Fisheries and Aquatic Sciences* 54: 2596–2608.
72. Kelaher BP, Underwood AJ, Chapman MG (2003) Experimental transplantations of coralline algal turf to demonstrate causes of differences in macrofauna at different tidal heights. *Journal of Experimental Marine Biology and Ecology* 282: 23–41.
73. Fairweather PG, Quinn GP (2007) Introduction: Australasian marine ecology in a global context. In: Connell SD, Gillanders BM, editors. *Marine Ecology*. Victoria, Australia: Oxford University Press. pp. 1–16.
